# Supplementary material for: A gemini surfactant-containing system with abundant self-assembly morphology and rheological behaviors tunable by photoinduction
Source: Royal Society of Chemistry journal article supplement (doi:10.1039/c8ra01070f), 2018-01-01
Supplement: c8ra01070f1.pdf [file c8ra01070f1.pdf]

## Supporting Information

### 1 Experimental Method

**Infrared spectroscopy** Fourier transform infrared (FT-IR) spectra were recorded using the Thermo Fisher Nicolet 6700 FT-IR spectrometer. The freeze-dried samples were prepared by KBr disc or film technique and the scan range was 4000–400  $\text{cm}^{-1}$ .

### 2 Results and Discussion

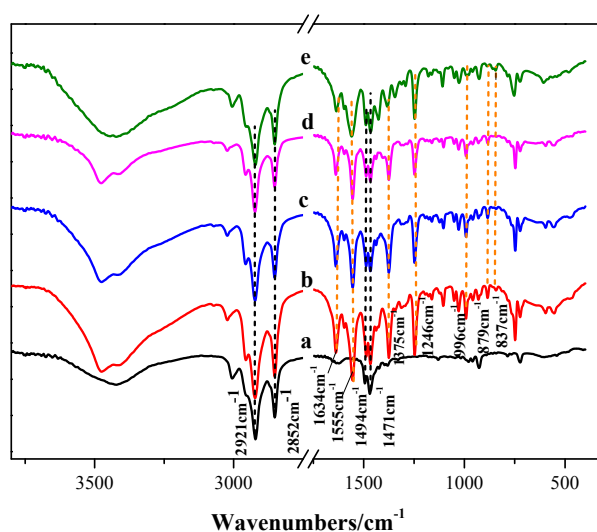

Fig. 1s FTIR spectra of 12-3-12·2Br-(a) and 12-3-12·2Br/*trans*-OMCA (10mM: 8mM) sample after being irradiated with UV light for 0, 20, 60 or 100 min.

The FT-IR spectra of 12-3-12·2Br/*trans*-OMCA samples (a: 12-3-12·2Br; b, c, d, e: 10mM12-3-12·2Br/8mM*trans*-OMCA samples before and after being irradiated with UV light (20, 40 or 60 min) were acquired. As can be seen from the Fig. 1s, the 2921  $\text{cm}^{-1}$  and 2852  $\text{cm}^{-1}$  are symmetrical and asymmetrical stretching vibrations of the alkyl chain C-H bond. The 1494  $\text{cm}^{-1}$  and 1471  $\text{cm}^{-1}$  are in-plane bending vibrations of methyl and methylene groups. Those peaks are linked to 12-3-12·2Br(a). For the 12-3-12·2Br/ *trans*-OMCA sample, the FT-IR spectrum of sample without UV light irradiation are showed in curve b. and the c, d, e represent that the sample were illuminated 20, 40, 60min respectively. All spectra present the characteristic bands of the acrylic C=C vibration at 1634  $\text{cm}^{-1}$  and 1555 $\text{cm}^{-1}$ , and the =C-H in-plane bending modes are observed at 1374 $\text{cm}^{-1}$  and 1246 $\text{cm}^{-1}$ , indicating that the *trans*-OMCA participates in the self-assembly of 12-3-12·2Br<sup>-</sup> micelles. *Trans* and *cis*

isomers can be distinguished by the position of their acrylic out-of-plane =C-H bending bands located at  $879\text{cm}^{-1}$  <sup>1</sup> and  $837\text{cm}^{-1}$  <sup>2</sup>, respectively. Fig.1s shows that the band at  $879\text{cm}^{-1}$  decreases and the intensity at  $837\text{cm}^{-1}$  increases with the prolongation of UV irradiation time. Furthermore, trans-OMCA presents a characteristic aromatic C-H in-plane bending vibration located at  $996\text{cm}^{-1}$ , which decreases with the UV irradiation time. This change are coherent with photoisomerization of trans to cis <sup>3</sup>, indicating that the addition of trans-OMCA participate the formation of aggregates, and the photoisomerization of trans to cis induced by the UV light lead to change of self-assembly structure.

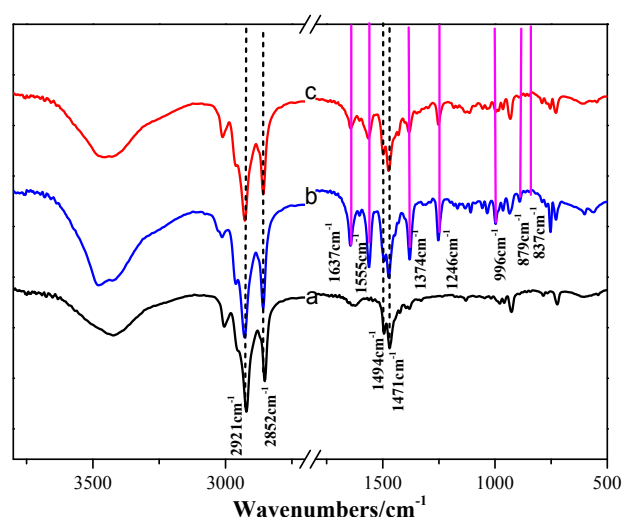

Fig. 2s FTIR spectra of 12-3-12-2Br-(a) and 12-3-12-2Br-/trans-OMCA (30mM: 10mM) sample after being irradiated with UV light for 0, 20, 60 or 100 min.

The Fig.2s shows the FT-IR spectra of wormlike micelle sample (30:10) before and after UV light. The trend of spectral variation is consistent with Fig.1s.

#### References:

- [1]Arjunan V, Anitha R, Thenmozhi S, et al. Journal of Molecular Structure, 2016, 1113:42-54.
- [2]Arjunan V, Anitha R, Marchewka M K, et al. Journal of Molecular Structure, 2015, 1080:122-136.
- [3]Pallares R M, Wang Y, Lim S H, et al. Nanomedicine, 2016, 11(21):2845-2860.
